# Supplementary material for: Odor identity coding by distributed ensembles of neurons in the mouse olfactory cortex
Source: eLife journal article supplement (doi:10.7554/elife.26337), 2017-05-10
Supplement: supp [file elife-26337-supp-v1.zip]

Archive with 5 entries (5 files):
- elife_poa_e26337_Figure_6_figure_supplement_2.pdf
- elife_poa_e26337_Figure_7_figure_supplement_1.pdf
- elife_poa_e26337_Figure_2_figure_supplement_1.pdf
- elife_poa_e26337_Figure_4_figure_supplement_1.pdf
- elife_poa_e26337_Figure_6_figure_supplement_1.pdf
