# Supplementary figures and images for: Odor identity coding by distributed ensembles of neurons in the mouse olfactory cortex
Source: eLife journal article supplement (doi:10.7554/elife.26337), 2017-05-10

**Figure 6 - figure supplement 2**

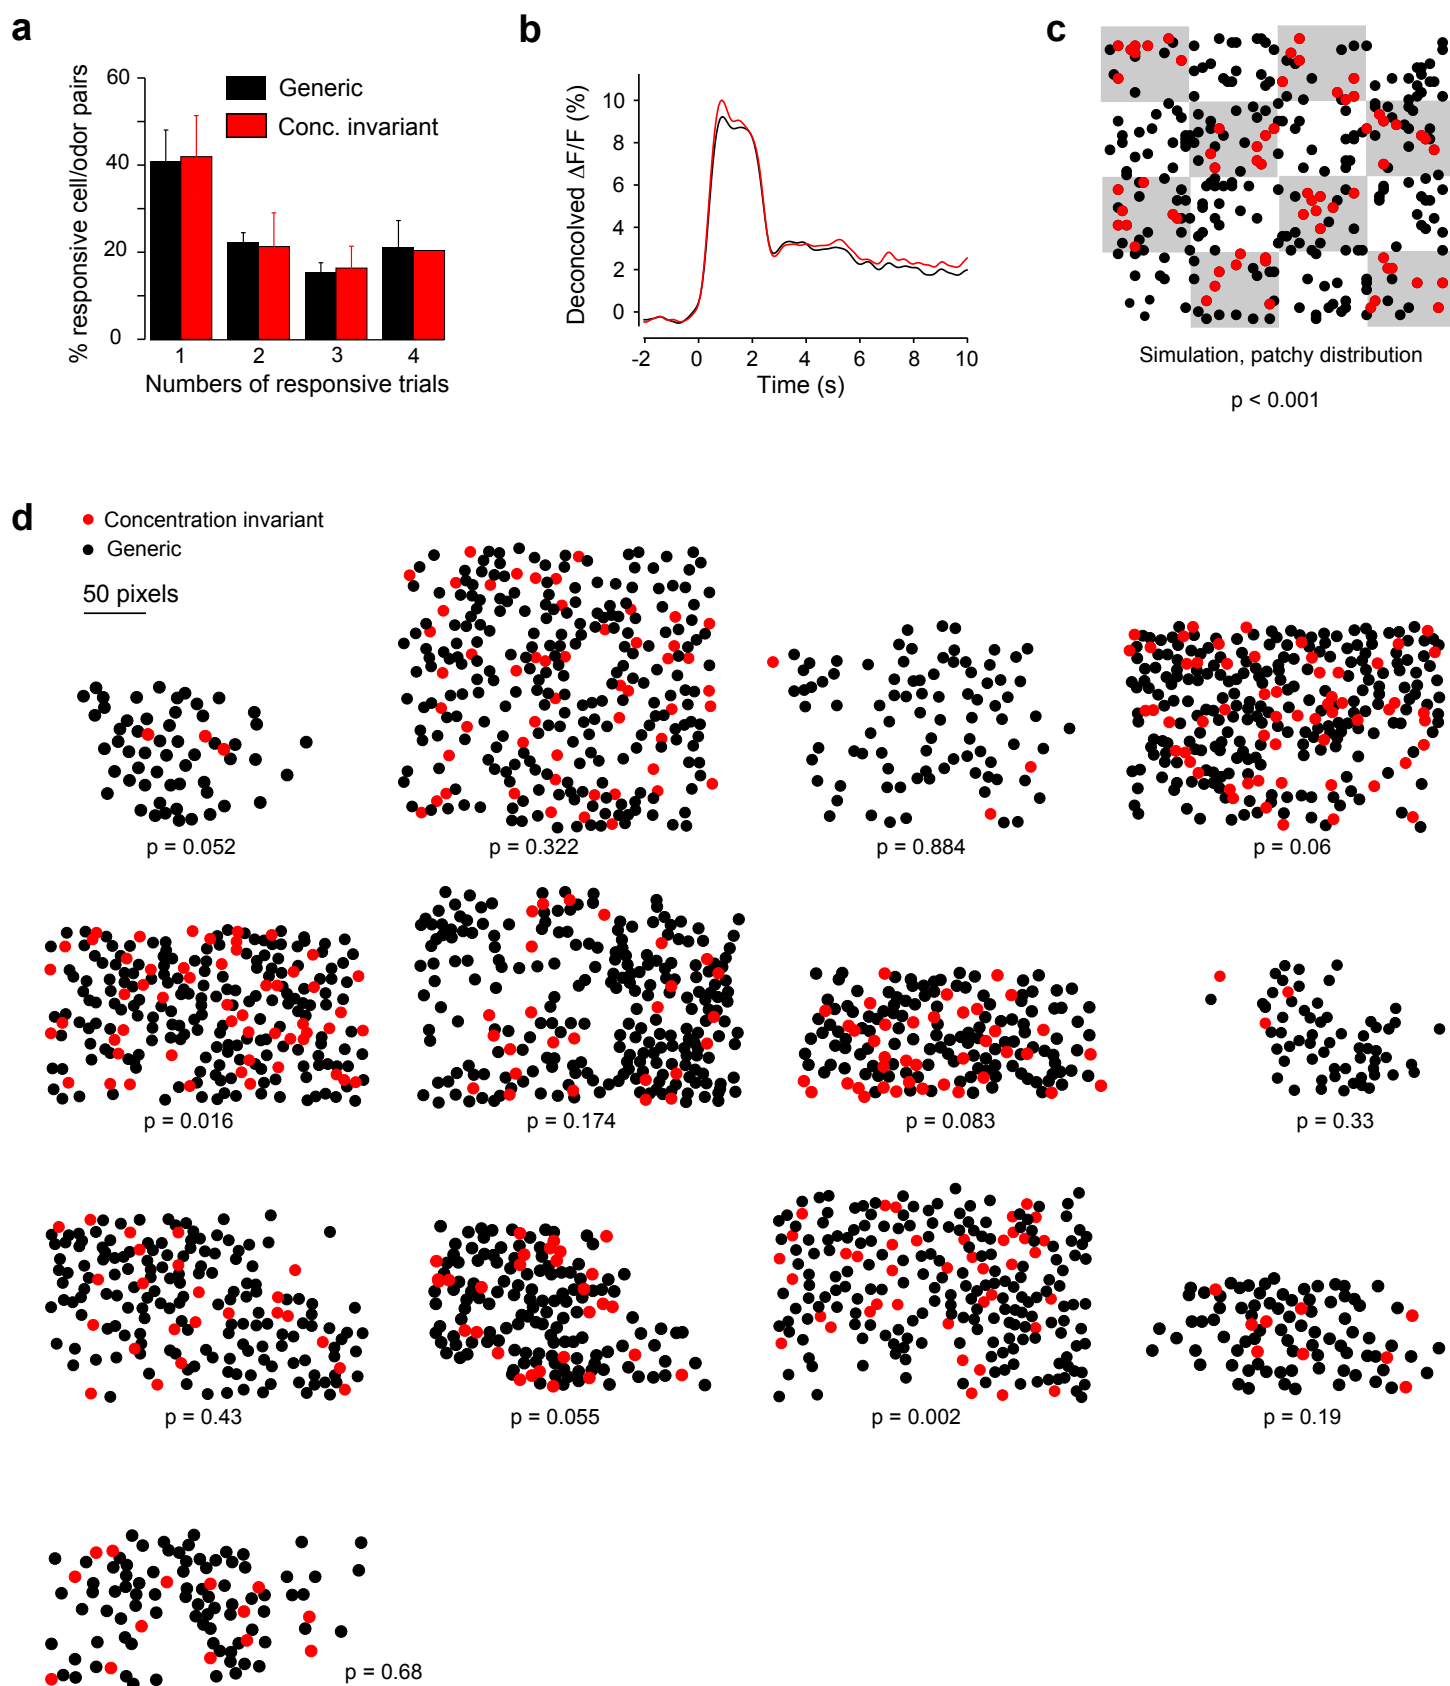

Supplement: supp [file elife-26337-supp-v1.zip › elife_poa_e26337_Figure_6_figure_supplement_2.pdf]

Figure 7 - figure supplement 1

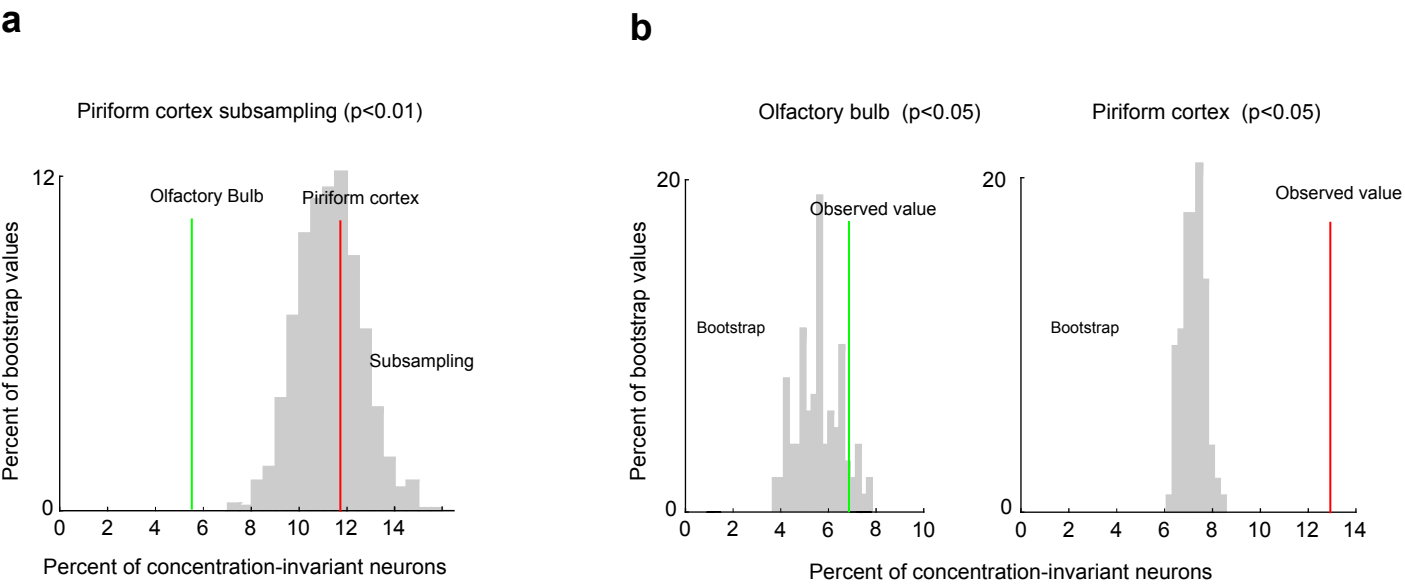

Supplement: supp [file elife-26337-supp-v1.zip › elife_poa_e26337_Figure_7_figure_supplement_1.pdf]

Figure 2 - figure supplement 1

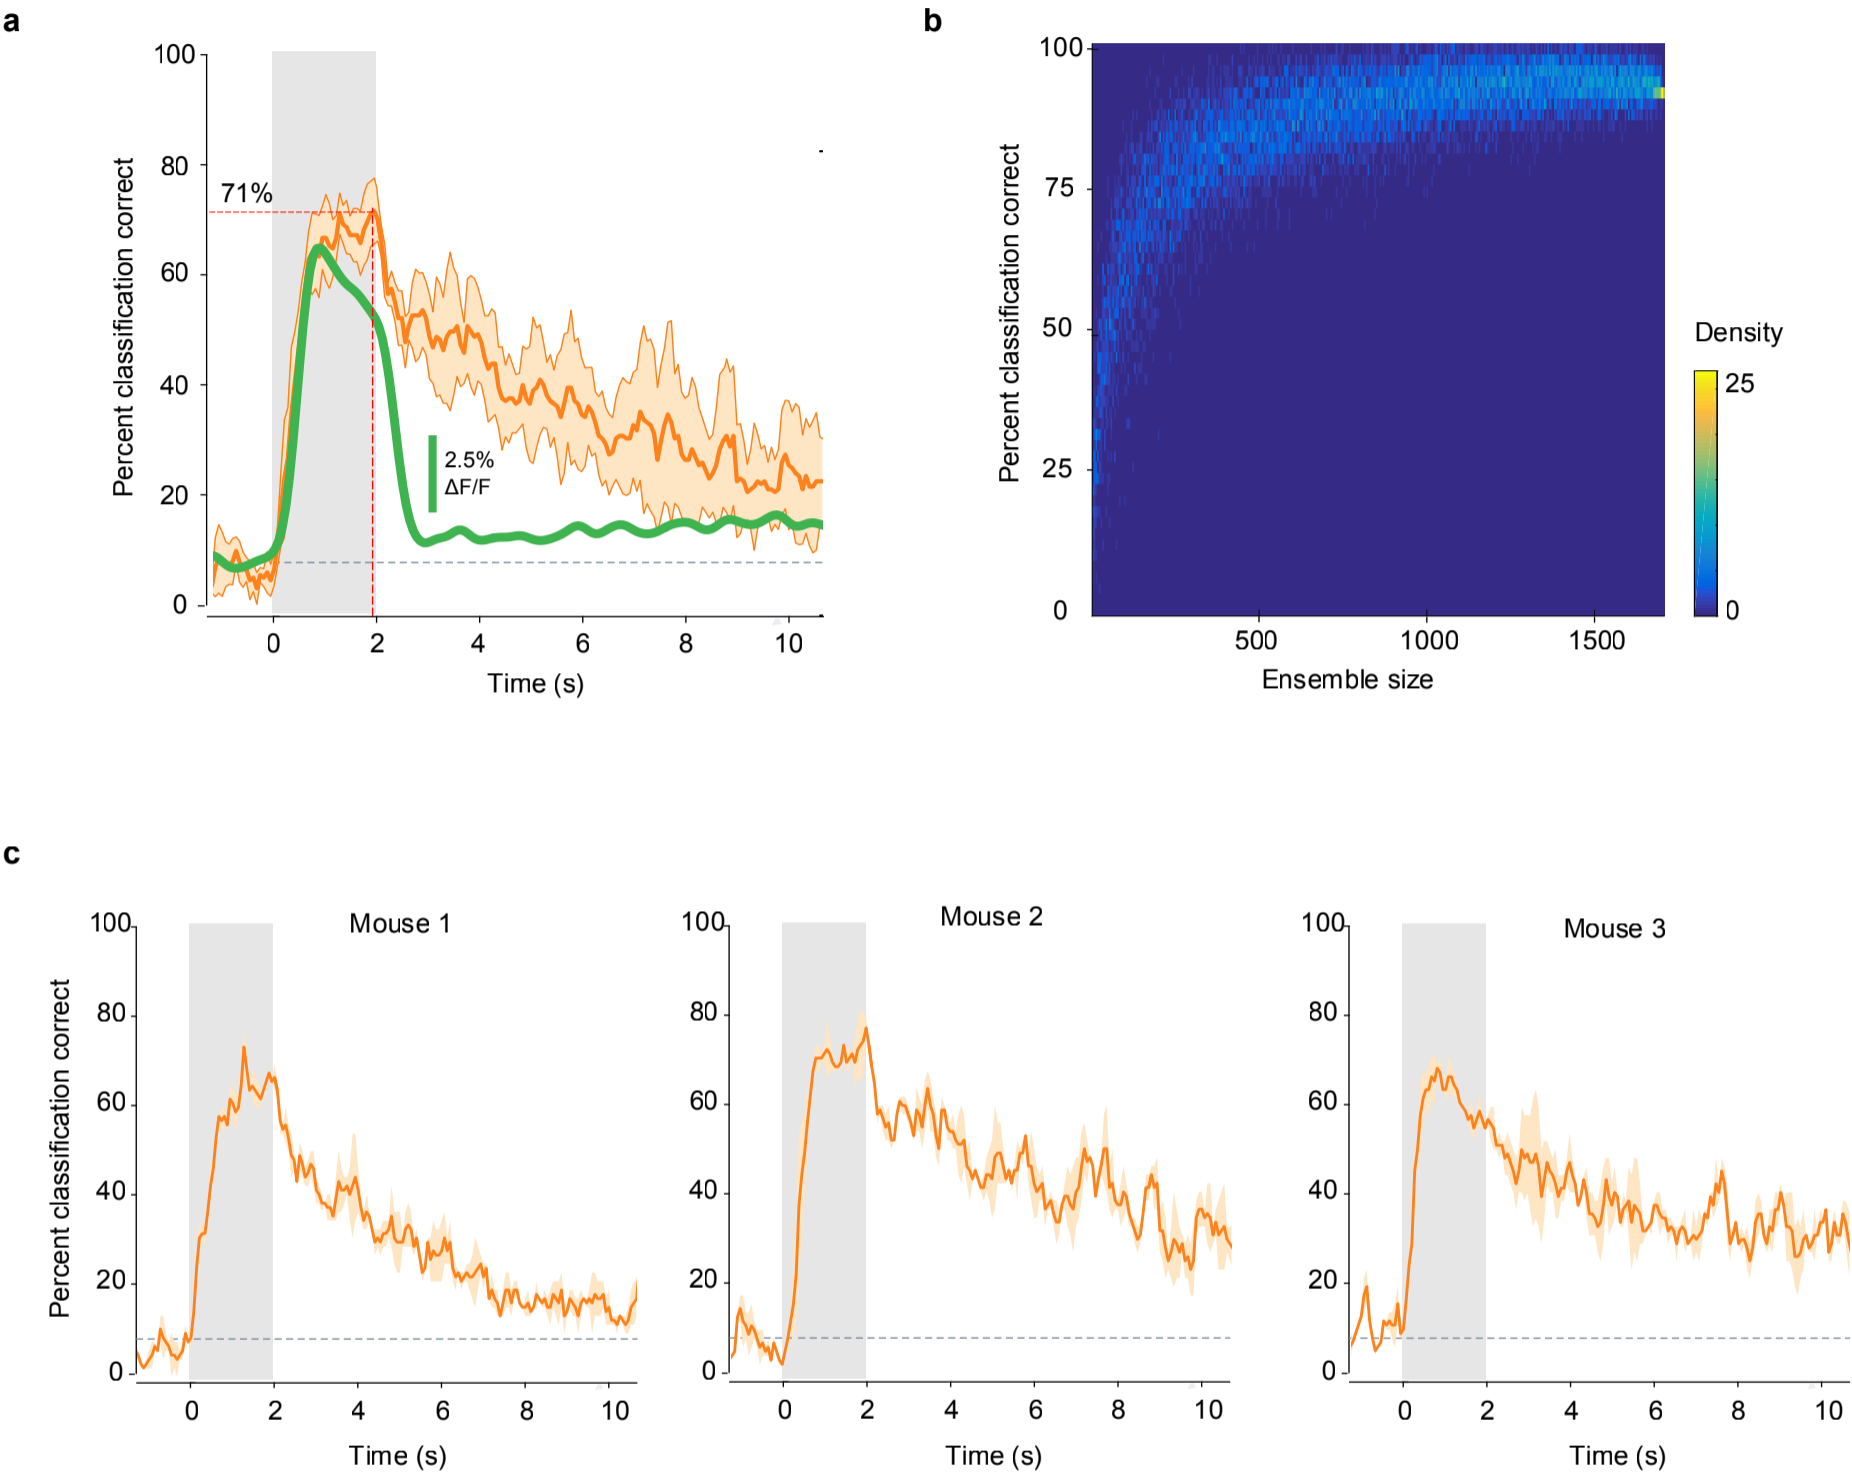

Supplement: supp [file elife-26337-supp-v1.zip › elife_poa_e26337_Figure_2_figure_supplement_1.pdf]

Figure 4 - figure supplement 1

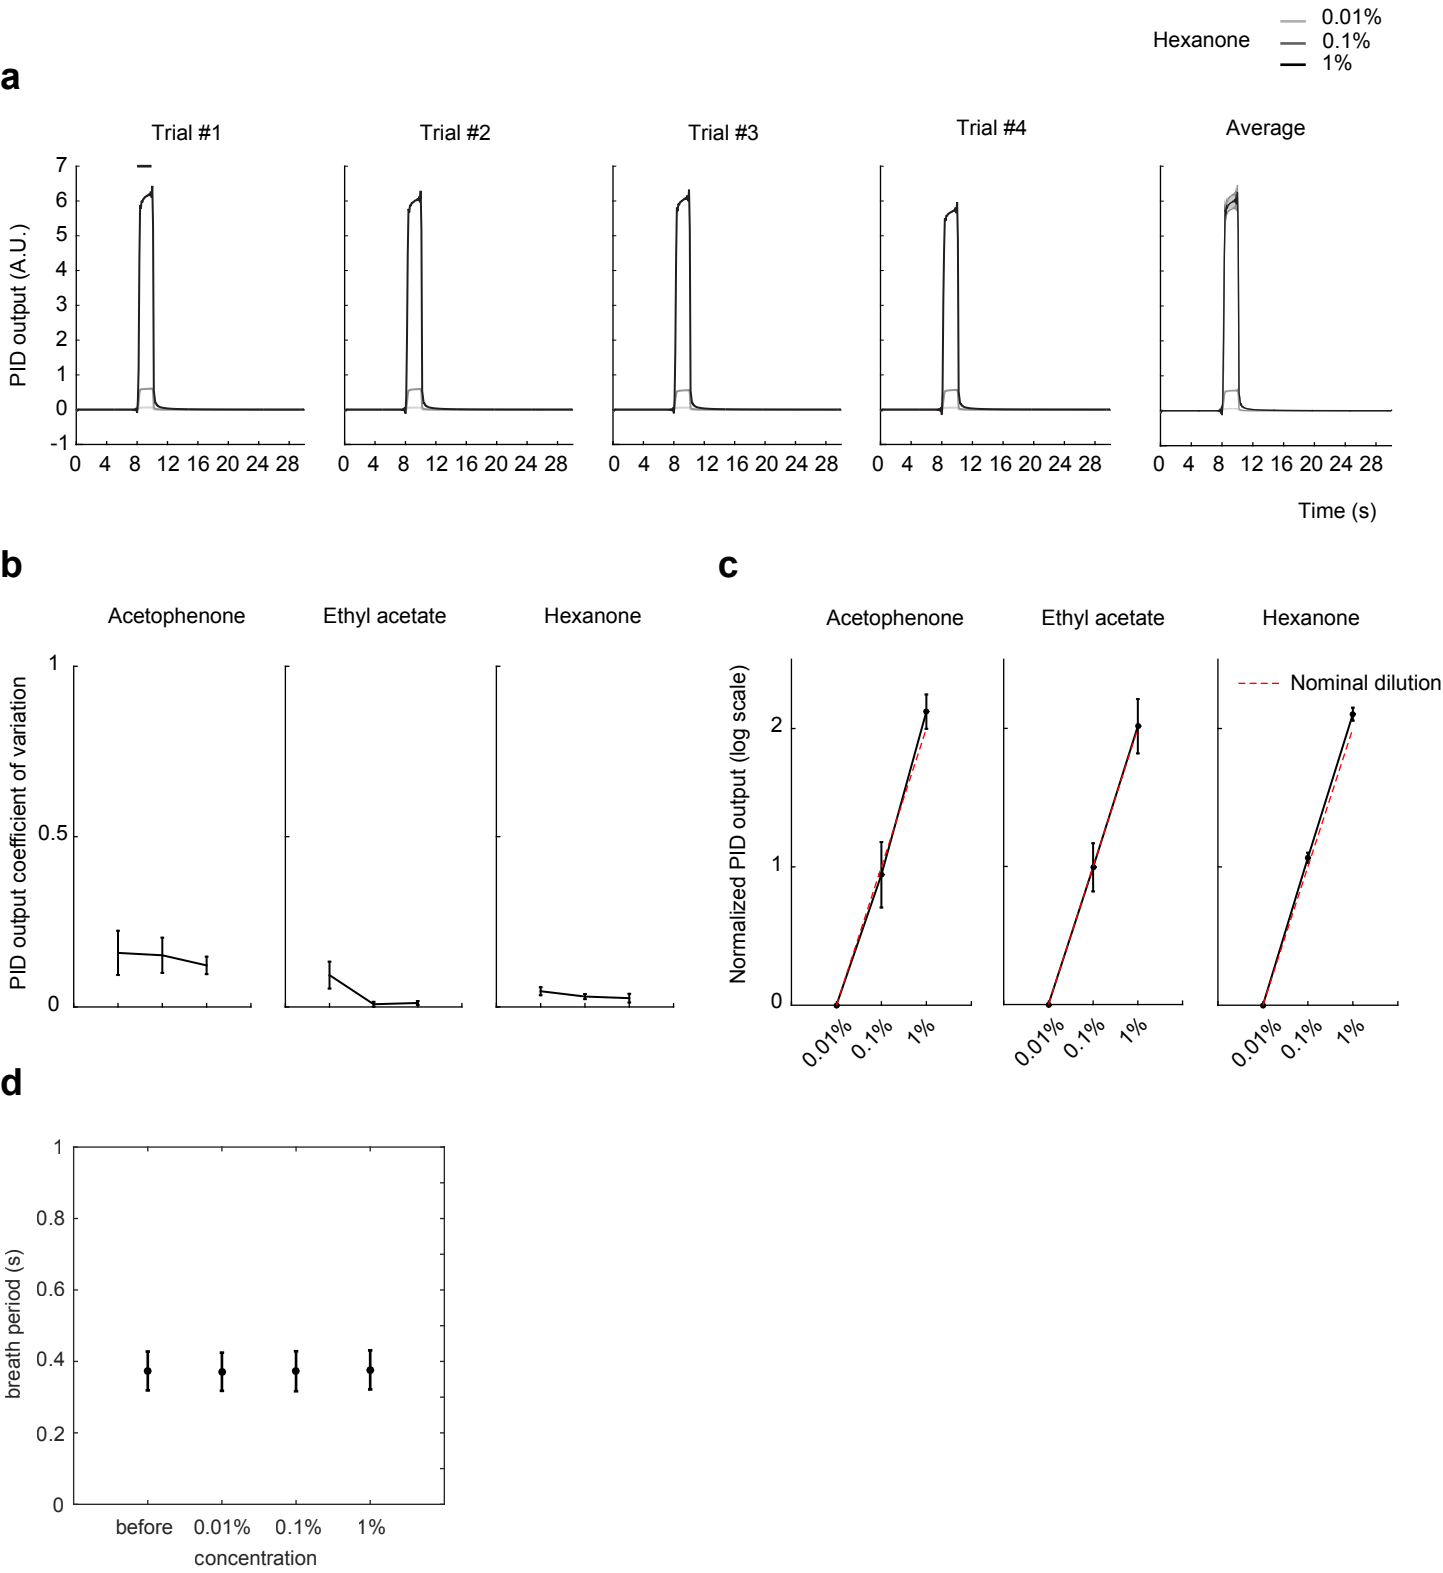

Supplement: supp [file elife-26337-supp-v1.zip › elife_poa_e26337_Figure_4_figure_supplement_1.pdf]

Figure 6 - figure supplement 1

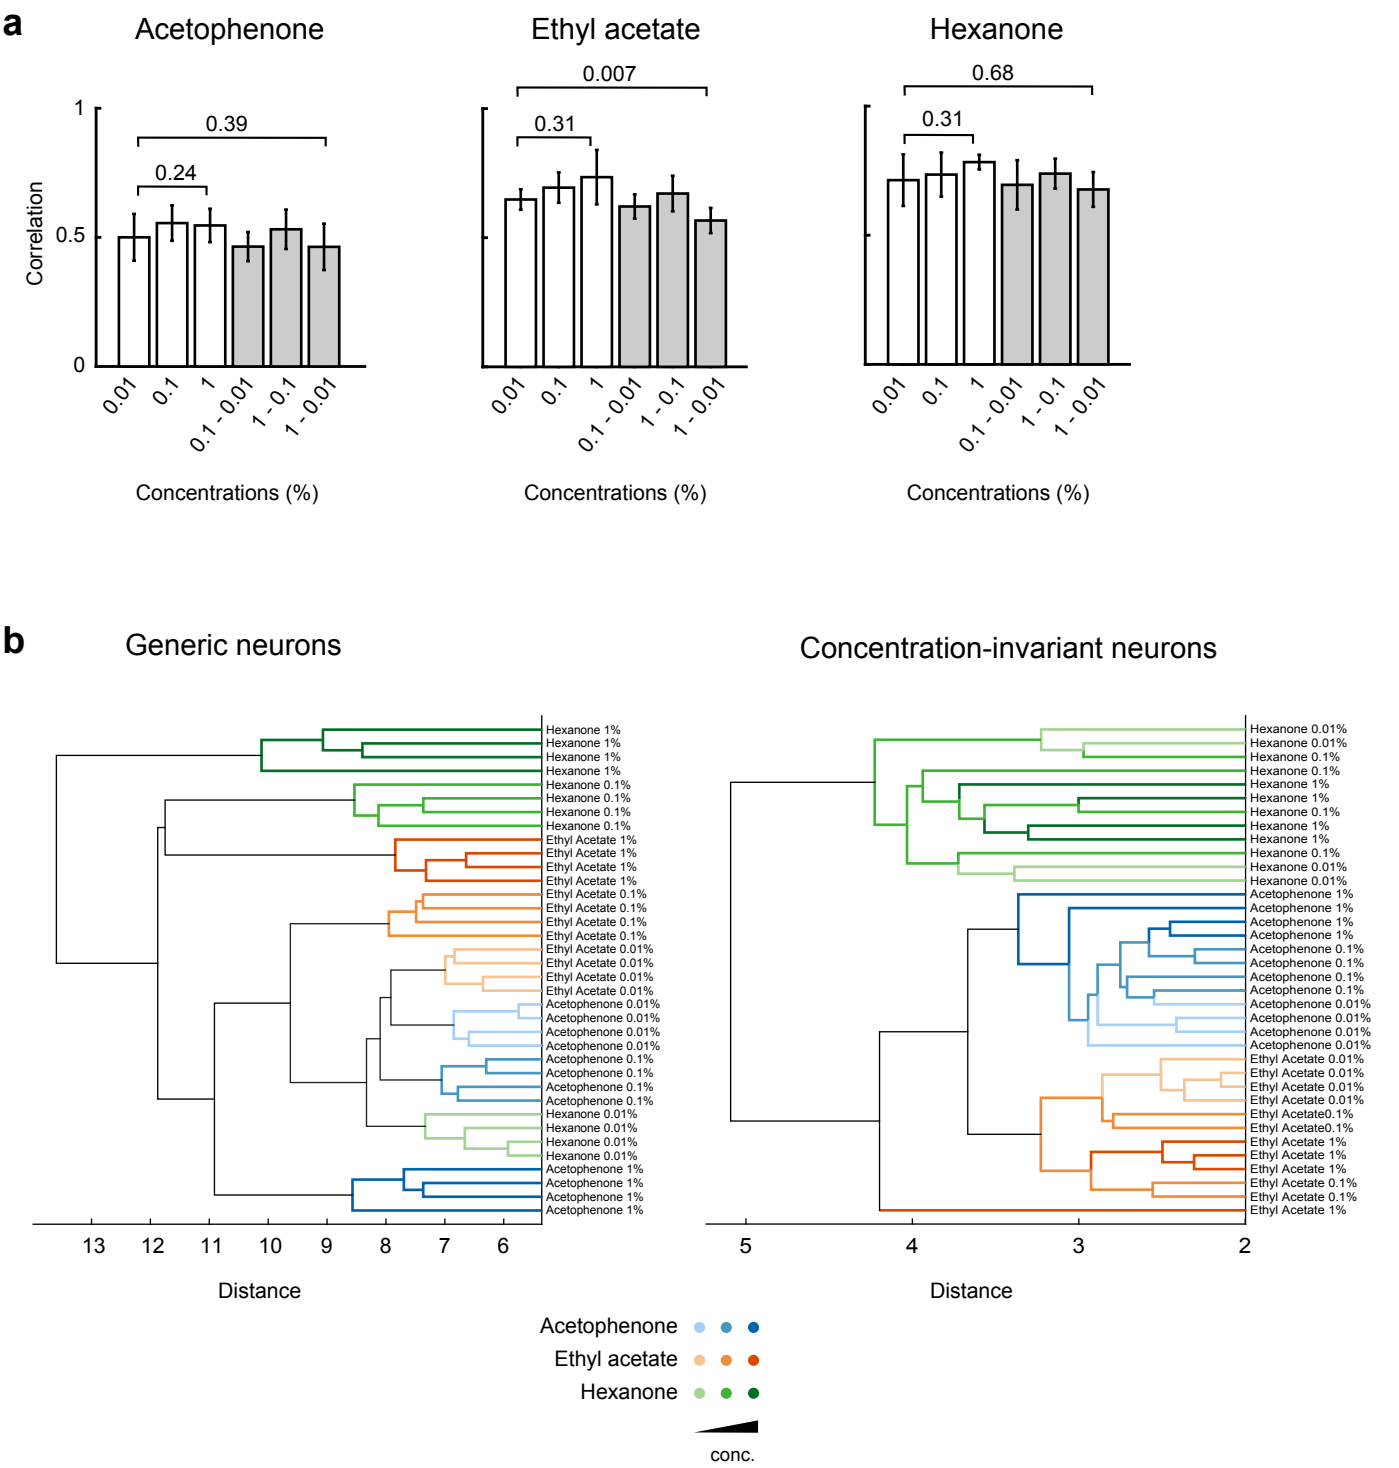

Supplement: supp [file elife-26337-supp-v1.zip › elife_poa_e26337_Figure_6_figure_supplement_1.pdf]
